# Supplementary material
Source: PubMed Central journal article supplement (PMC9177791)

Figure S1:

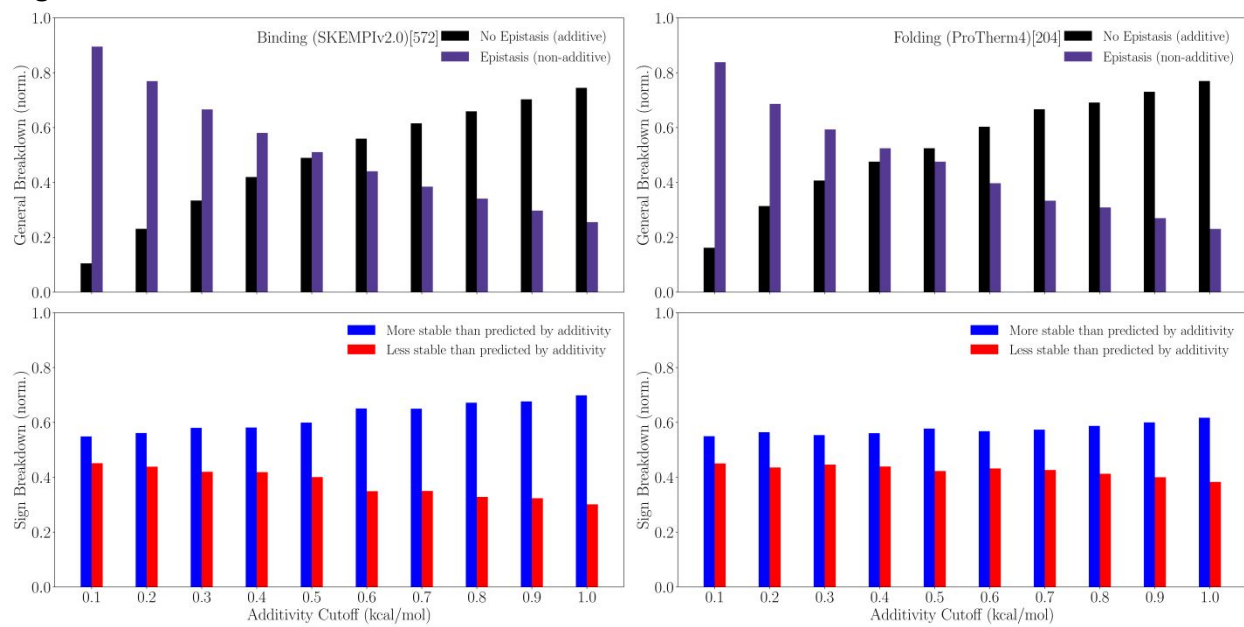

Figure S2:

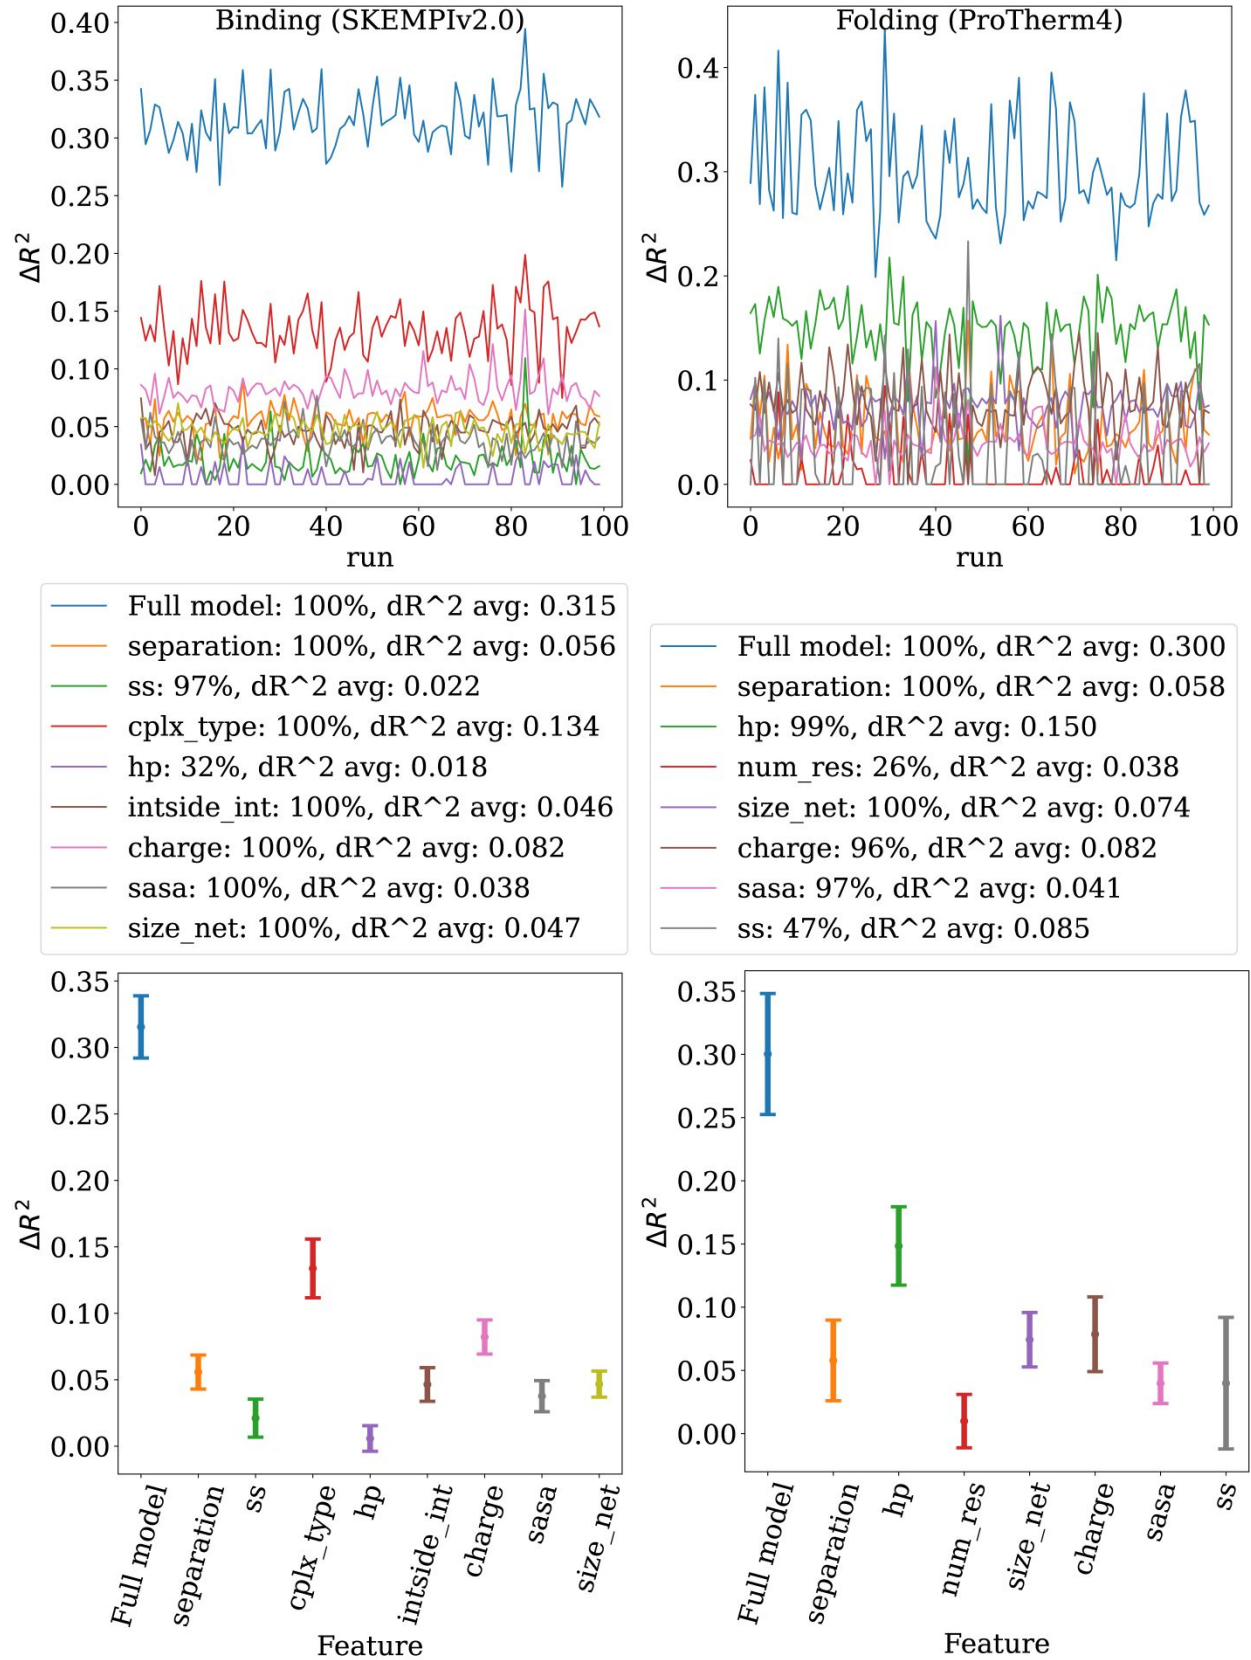

**Figure S3:**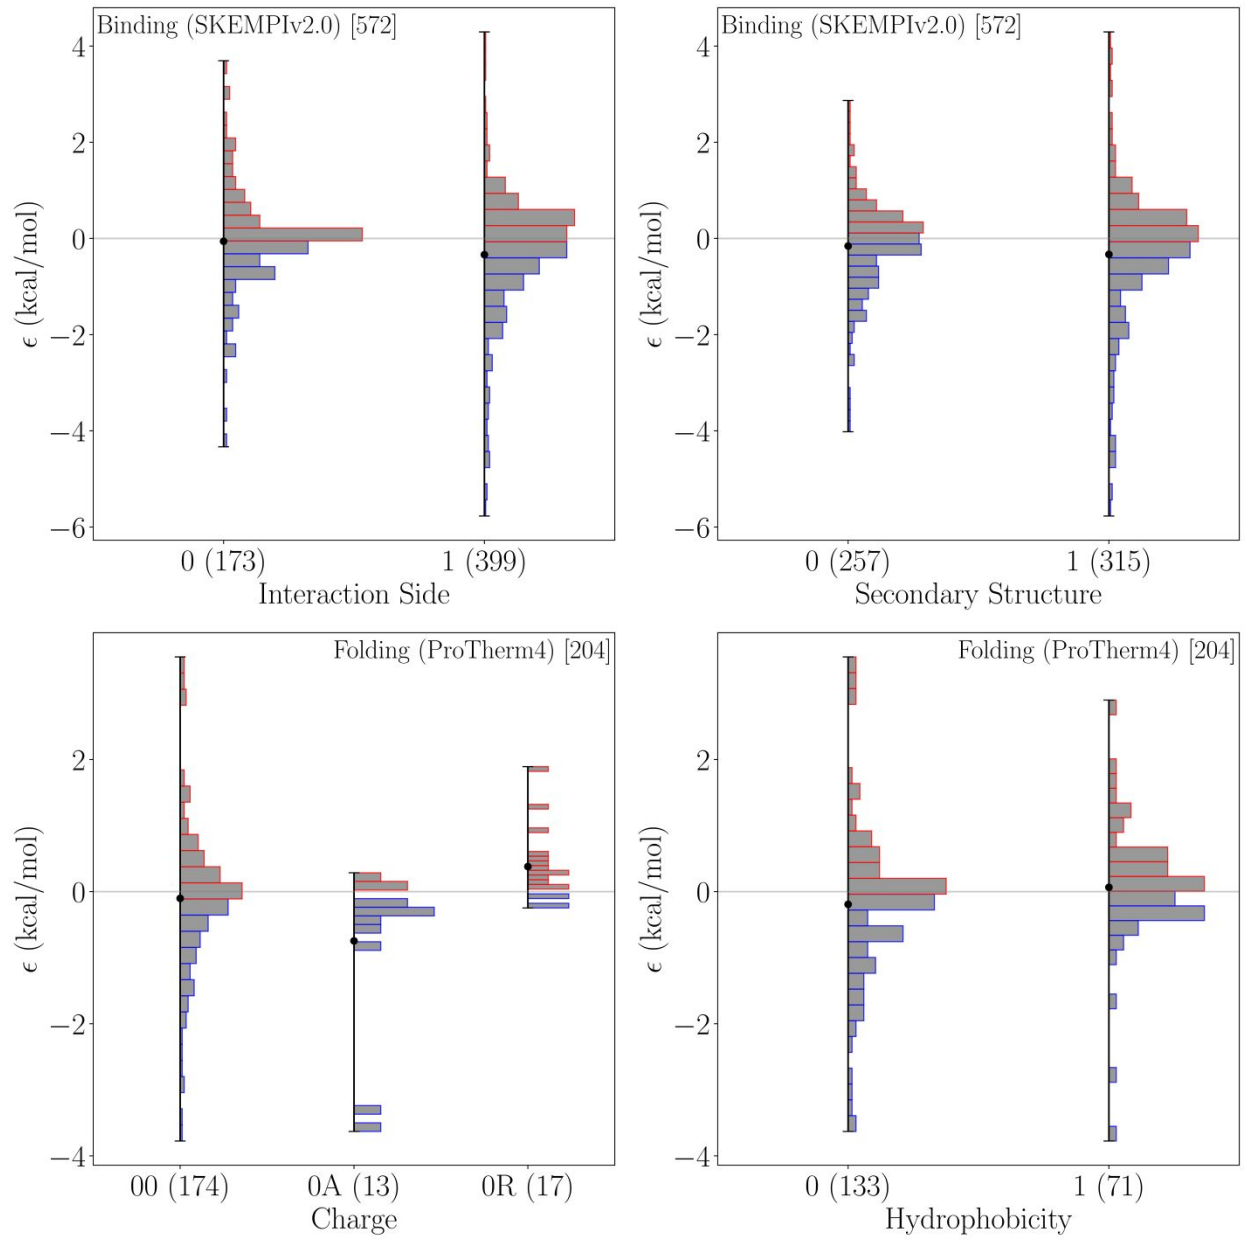

Supplement: NIHMS1784239-supplement-1.pdf [file NIHMS1784239-supplement-1.pdf]
